# Supplementary material for: Intermetallic Cu11In9in situ formed on hierarchical nanoporous Cu for highly selective CO2 electroreduction
Source: Royal Society of Chemistry journal article supplement (doi:10.1039/d1ta10163c), 2022-01-01
Supplement: d1ta10163c1.pdf [file d1ta10163c1.pdf]

Electronic Supplementary Information for

**Intermetallic Cu<sub>11</sub>In<sub>9</sub> In-Situ Formed on Hierarchical Nanoporous Cu for  
Highly Selective CO<sub>2</sub> Electroreduction**

Wu-Bin Wan<sup>‡a</sup>, Tian-Yi Dai<sup>‡a</sup>, Hang Shi<sup>‡a</sup>, Shu-Pei Zeng<sup>a</sup>, Zi Wen<sup>a</sup>, Wei Zhang<sup>a</sup>, Xing-  
You Lang<sup>a,b,\*</sup>, Qing Jiang<sup>a,\*</sup>

<sup>a</sup> *Key Laboratory of Automobile Materials (Jilin University), Ministry of Education, and School  
of Materials Science and Engineering, Jilin University, Changchun 130022, China*

<sup>b</sup> *State Key Laboratory of Automotive Simulation and Control, Jilin University, 130022  
Changchun, China*

‡ These authors contributed equally to this work.

\*Corresponding author.

E-mail: xylang@jlu.edu.cn (X.Y. Lang),

jiangq@jlu.edu.cn (Q. Jiang).

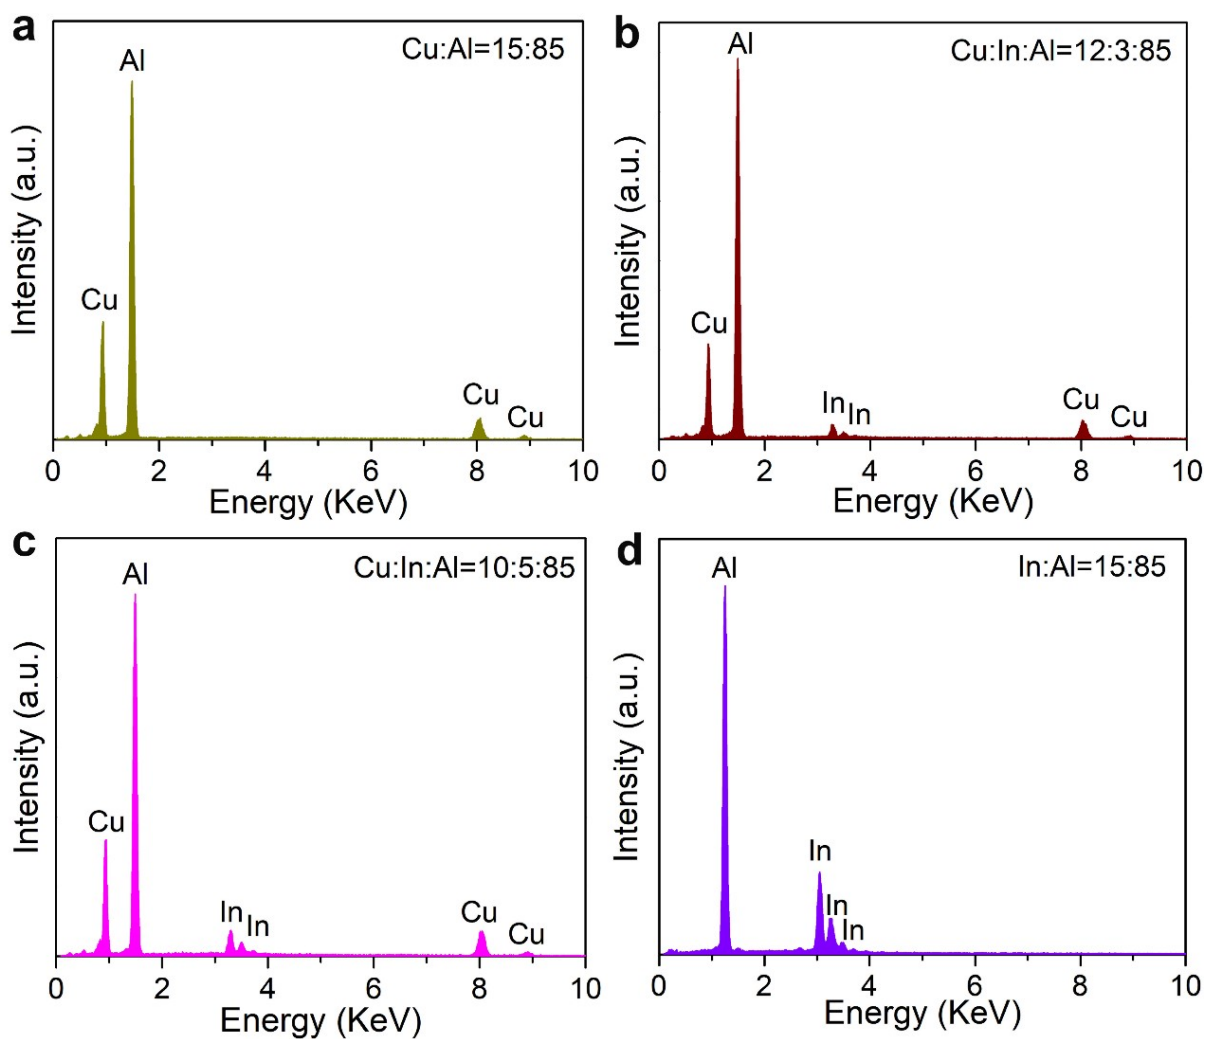

**Fig. S1.** EDS spectra of precursor  $\text{Cu}_{15-x}\text{In}_x\text{Al}_{85}$  alloys. (a) EDS spectrum of  $\text{Cu}_{15}\text{Al}_{85}$  alloy. (b) EDS spectrum of  $\text{Cu}_{12}\text{In}_3\text{Al}_{85}$  alloy. c, EDS spectrum of  $\text{Cu}_{10}\text{In}_5\text{Al}_{85}$  alloy. d, EDS spectrum  $\text{In}_{15}\text{Al}_{85}$  alloy.

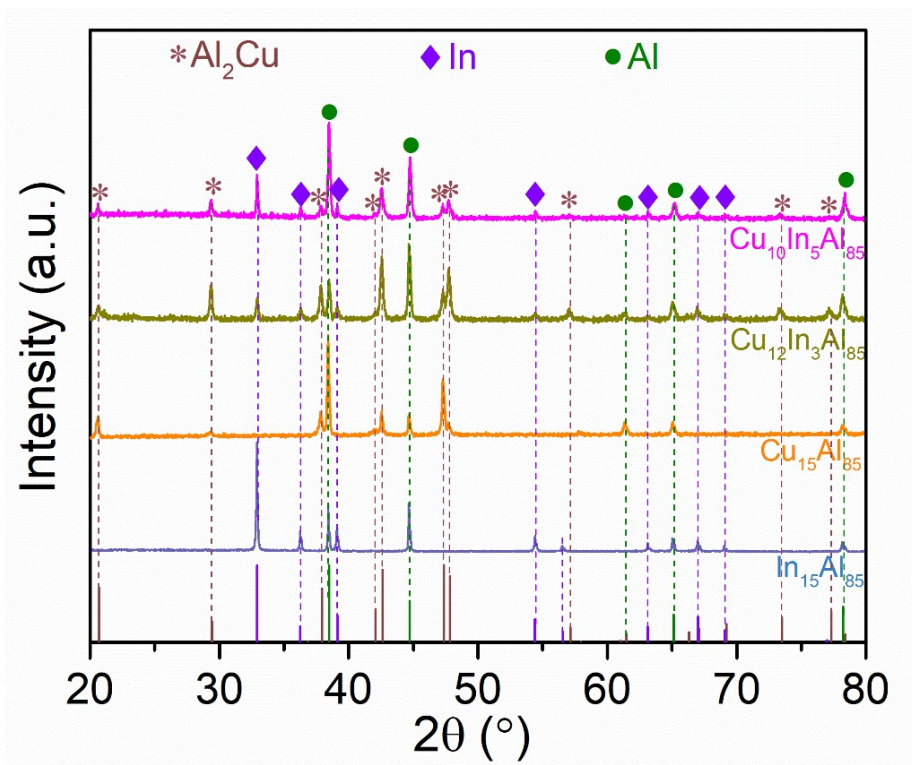

**Fig. S2.** XRD patterns of precursor alloys of  $\text{Cu}_{15-x}\text{In}_x\text{Al}_{85}$  alloys with  $x = 0, 3, 5$  and  $15$ .

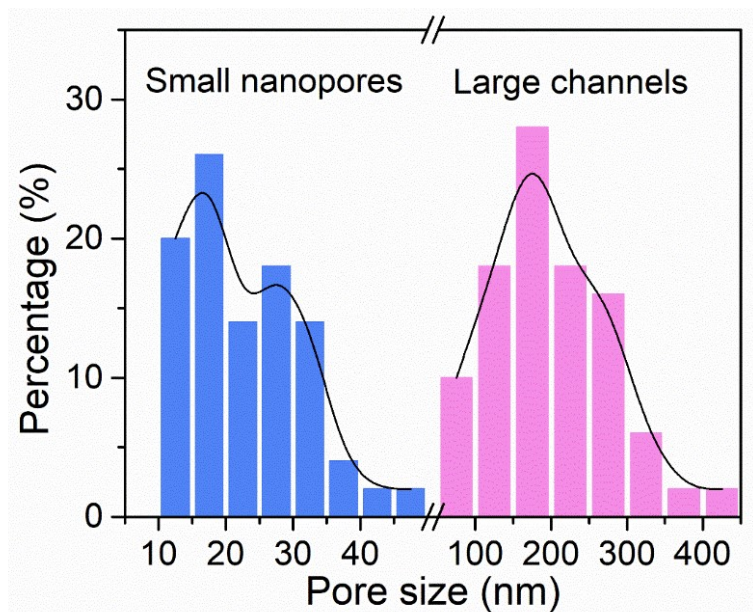

**Fig. S3.** Size distribution of small nanopores and large channels in hierarchical nanoporous  $\text{Cu}_{11}\text{In}_9/\text{Cu}$  hybrid electrode that is fabricated by chemically dealloying  $\text{Cu}_{10}\text{In}_5\text{Al}_{85}$  precursor alloy.

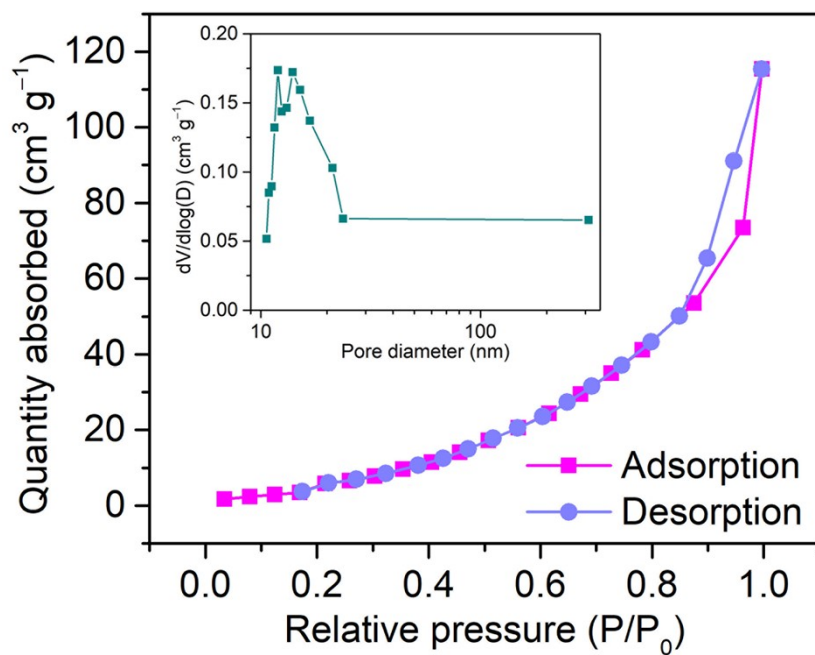

**Fig. S4.** The nitrogen adsorption/desorption isotherm of nanoporous  $\text{Cu}_{11}\text{In}_9/\text{Cu}$  hybrid electrode. Inset: Size distribution of small nanopores.

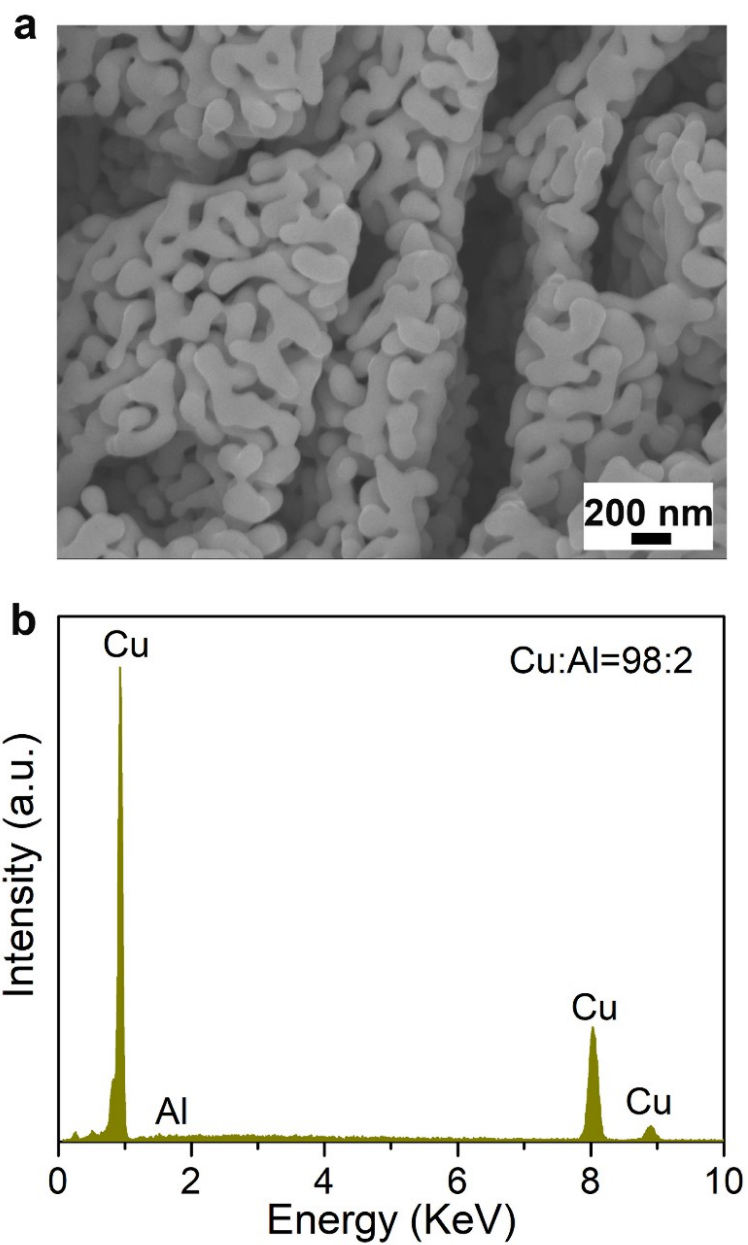

**Fig. S5.** (a, b) Typical SEM (a) and EDS spectrum (b) of nanoporous Cu electrode, which is fabricated by chemically dealloying  $\text{Cu}_{15}\text{Al}_{85}$  alloy.

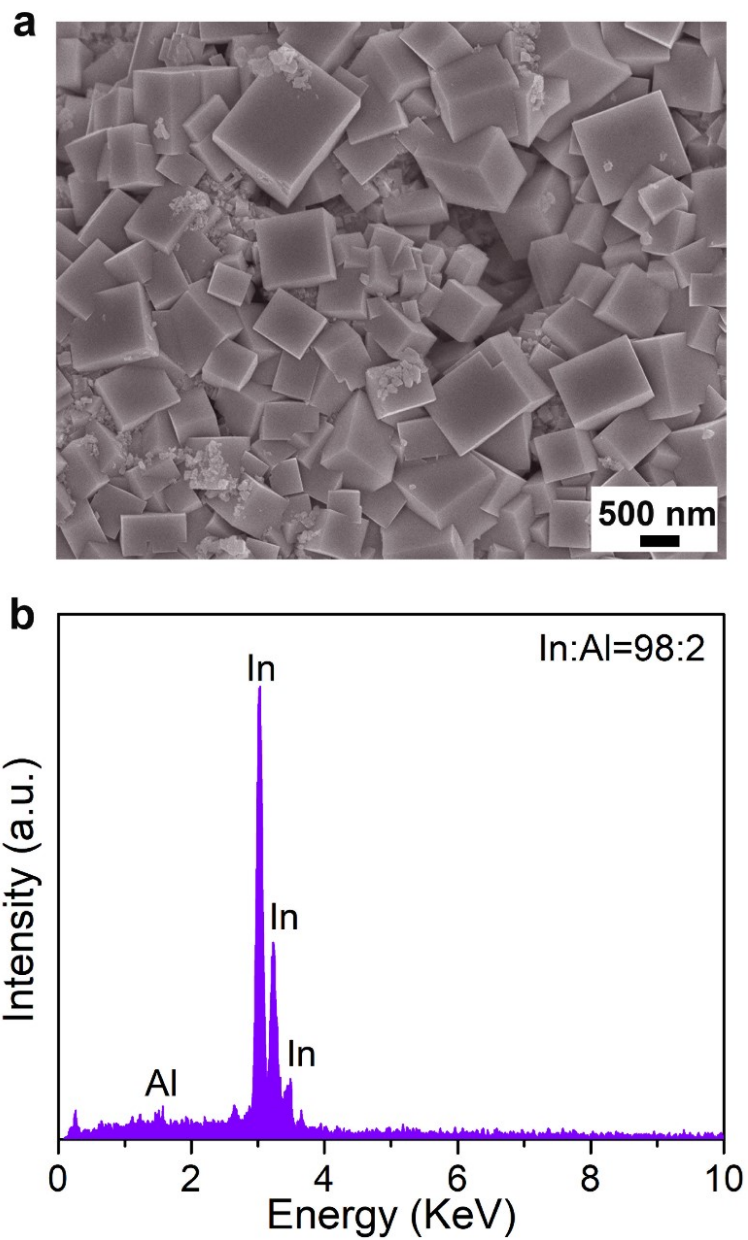

**Fig. S6.** (a, b) Typical SEM (a) and EDS spectrum (b) of  $\text{In}(\text{OH})_3/\text{In}$  electrode, which is fabricated by chemically dealloying  $\text{In}_{15}\text{Al}_{85}$  alloy.



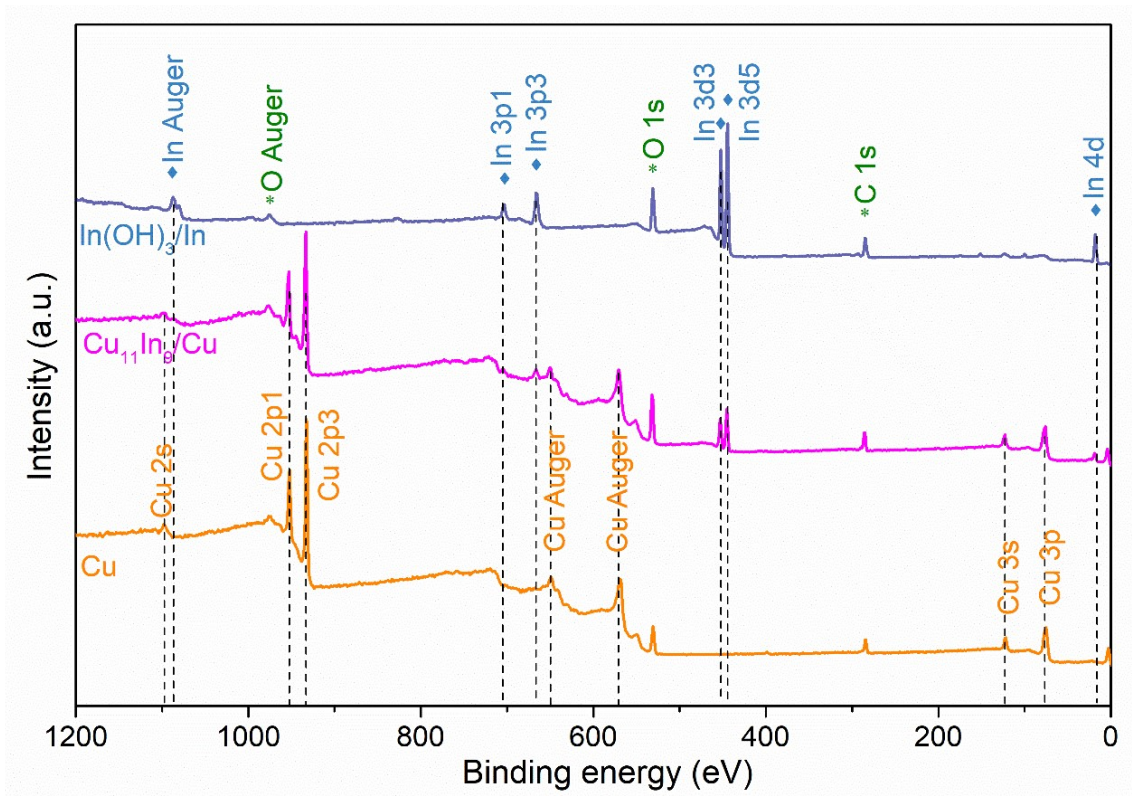

**Fig. S7.** XPS survey for nanoporous Cu<sub>11</sub>In<sub>9</sub>/Cu, nanoporous bare Cu and In(OH)<sub>3</sub>/In, electrodes, which are prepared by chemically dealloying Cu<sub>10</sub>In<sub>5</sub>Al<sub>85</sub>, Cu<sub>15</sub>Al<sub>85</sub>, and In<sub>15</sub>Al<sub>85</sub> alloys, respectively.



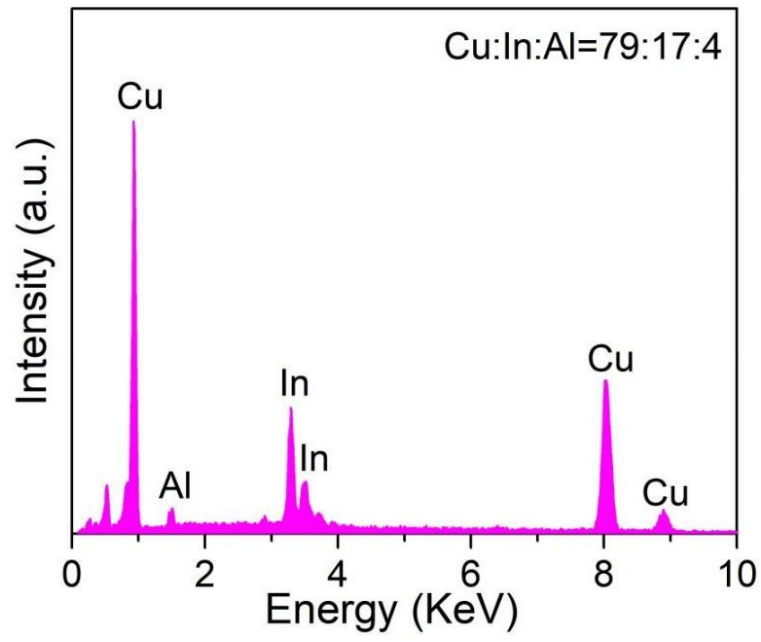

**Fig. S8.** EDS spectrum of as-dealloyed nanoporous  $\text{Cu}_{11}\text{In}_9/\text{Cu}$  hybrid electrode, which is prepared by chemically dealloying  $\text{Cu}_{10}\text{In}_5\text{Al}_{85}$  alloy.

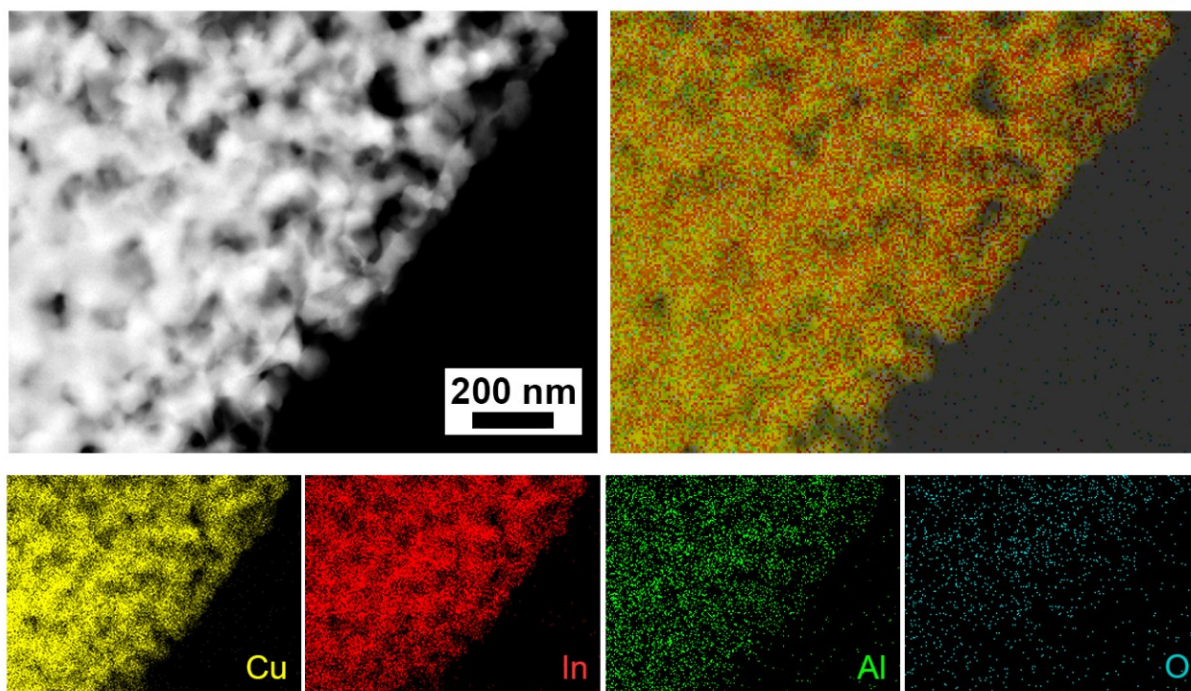

**Fig. S9.** STEM image of as-dealloyed nanoporous  $\text{Cu}_{11}\text{In}_9/\text{Cu}$  hybrid electrode and its corresponding STEM-EDS elemental mapping of Cu, In, Al and O.

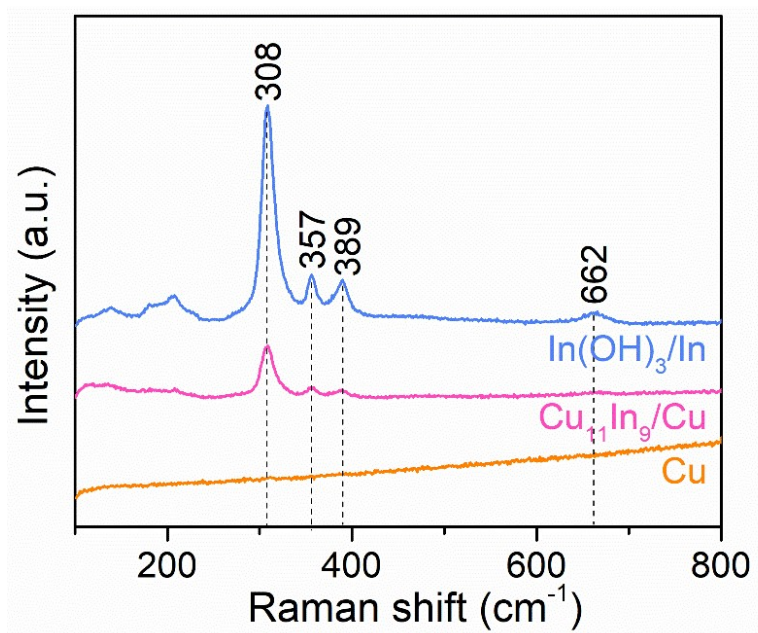

**Fig. S10.** Raman spectra of as-dealloyed nanoporous Cu<sub>11</sub>In<sub>9</sub>/Cu, nanoporous bare Cu, and In(OH)<sub>3</sub>/In electrodes.

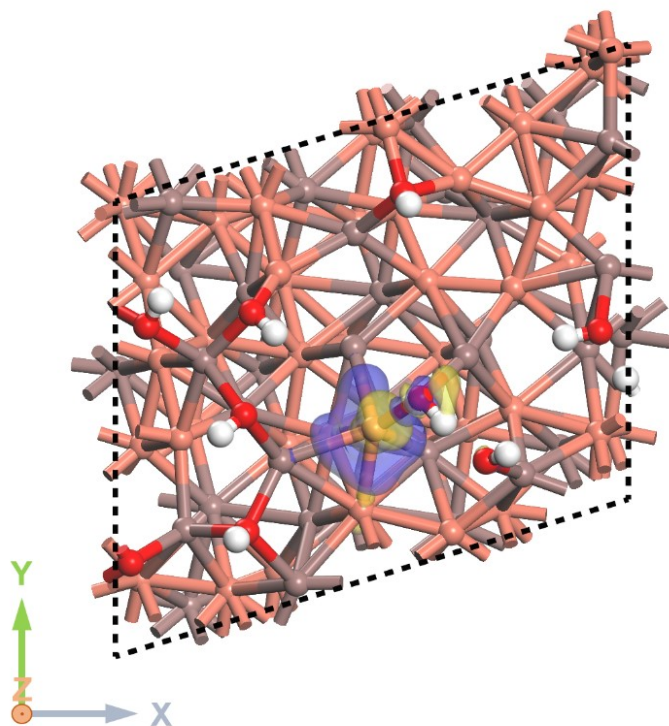

**Fig. S11.** The charge density difference diagram of Cu-In(OH)<sub>x</sub>/Cu<sub>11</sub>In<sub>9</sub>(313) and the Hirshfeld charge analysis. The blue isosurfaces represent charge accumulation and the yellow represent charge depletion.

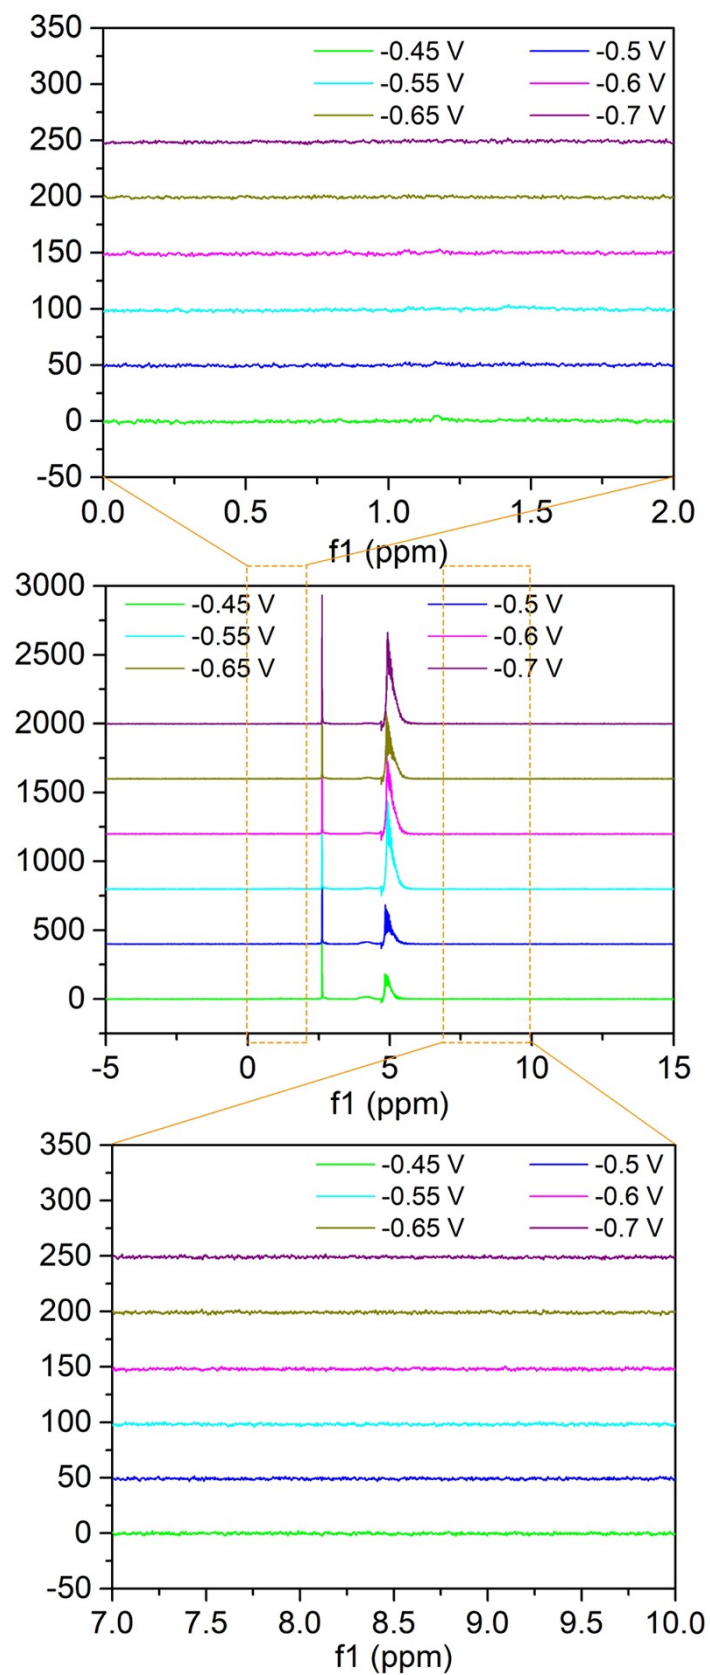

**Fig. S12.** Detection of liquid products of nanoporous Cu<sub>11</sub>In<sub>9</sub>/Cu hybrid electrode by <sup>1</sup>H nuclear magnetic resonance spectroscopy.

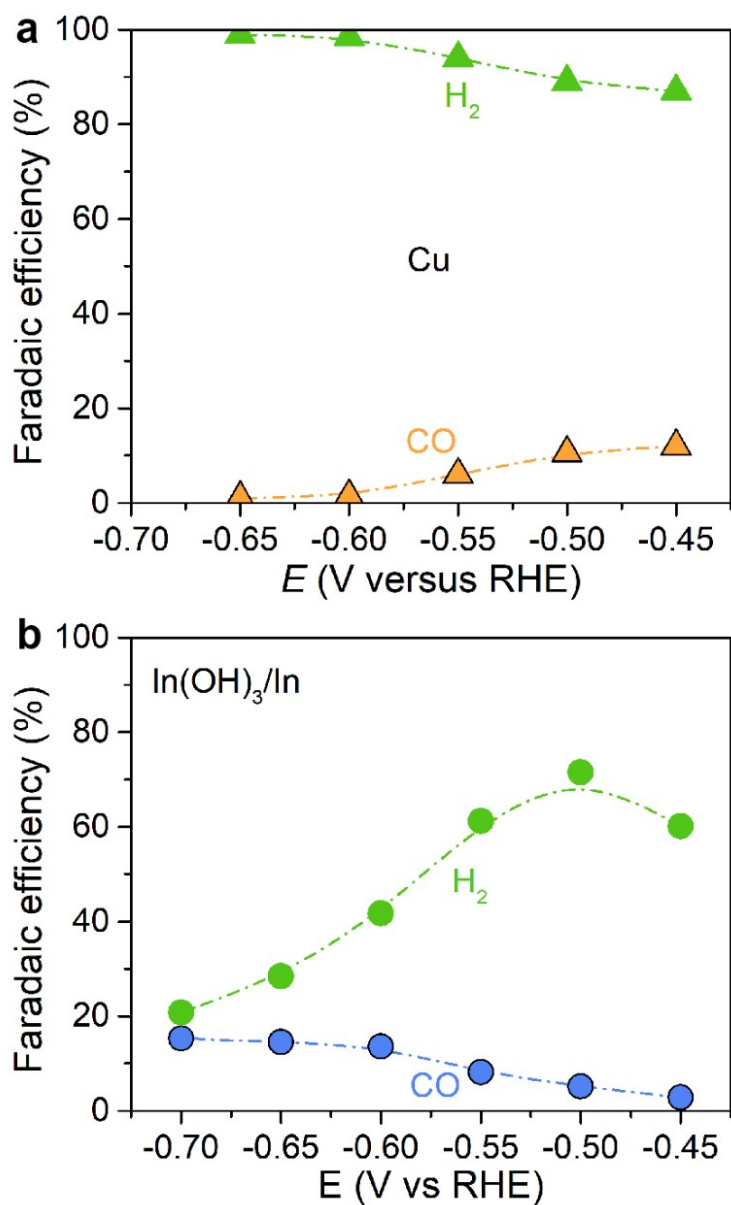

**Fig. S13.** (a) Faradaic efficiencies of CO and  $H_2$  products during the  $CO_2$  electroreduction of nanoporous bare Cu electrode in  $CO_2$ -saturated 0.1 M  $KHCO_3$  solution at various potentials ranging from -0.45 to -0.65 V versus RHE. (b) Faradaic efficiencies of CO and  $H_2$  products during the  $CO_2$  electroreduction of  $In(OH)_3/In$  electrode in  $CO_2$ -saturated 0.1 M  $KHCO_3$  solution at various potentials ranging from -0.45 to -0.70 V versus RHE.



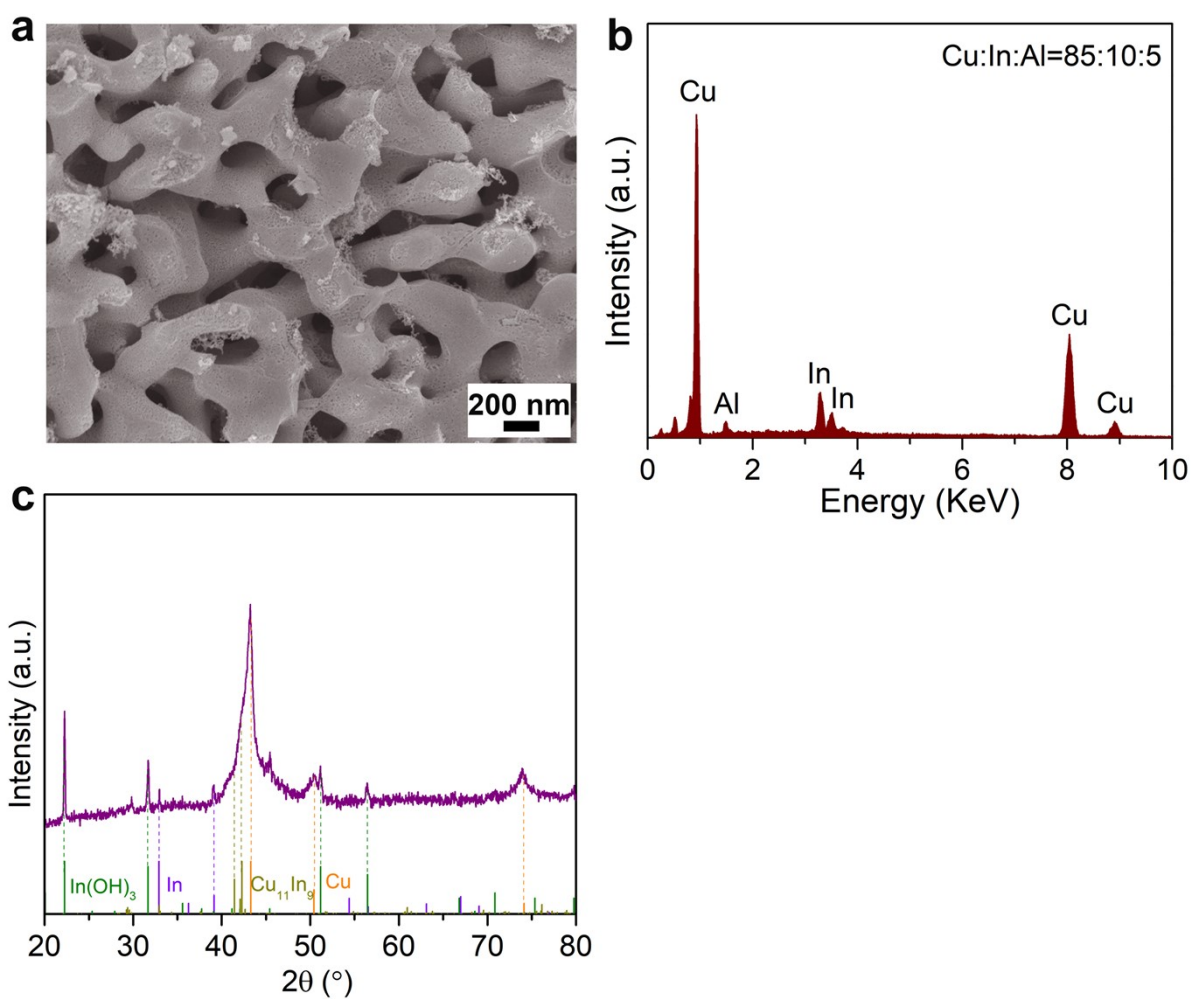

**Fig. S14.** (a) Typical SEM of as-dealloyed nanoporous  $\text{Cu}_{11}\text{In}_9/\text{Cu}$  from precursor  $\text{Cu}_{12}\text{In}_3\text{Al}_{85}$  alloy. (b) EDS spectrum of as-dealloyed nanoporous  $\text{Cu}_{11}\text{In}_9/\text{Cu}$  from precursor  $\text{Cu}_{12}\text{In}_3\text{Al}_{85}$  alloy. (c) XRD patterns of as-dealloyed nanoporous  $\text{Cu}_{11}\text{In}_9/\text{Cu}$  from precursor  $\text{Cu}_{12}\text{In}_3\text{Al}_{85}$  alloy.



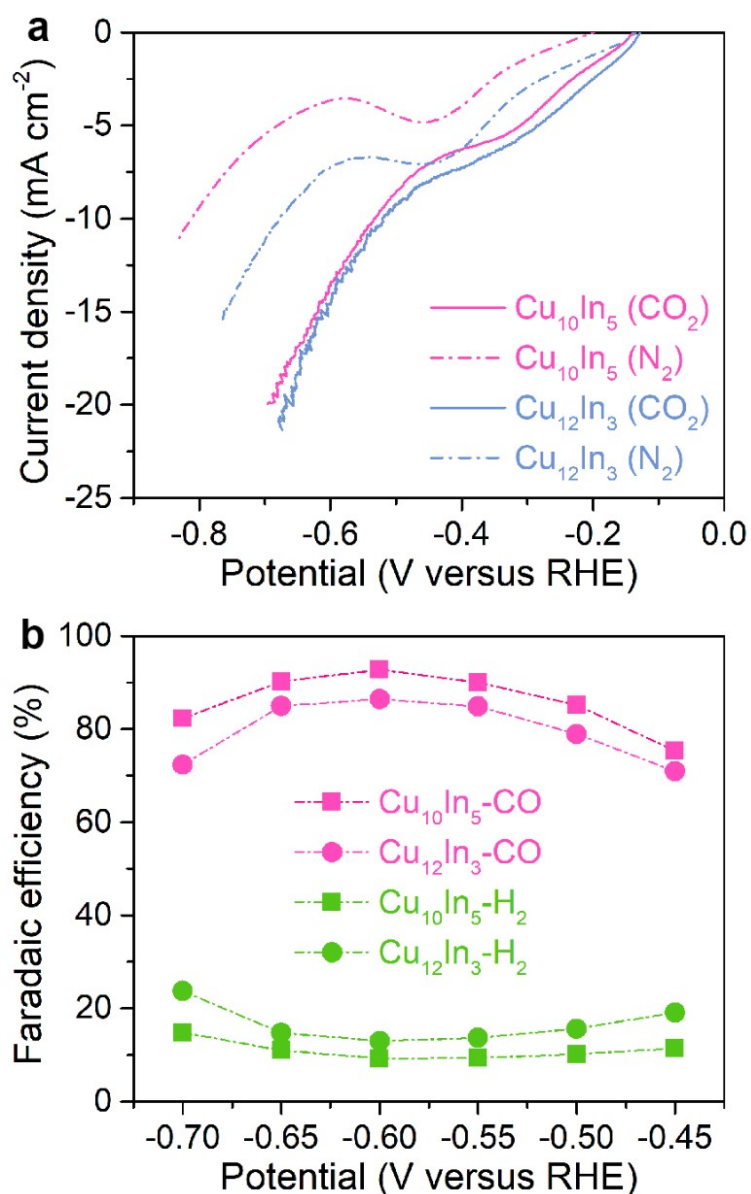

**Fig. S15.** (a) Comparison of LSV curves for as-dealloyed nanoporous Cu<sub>11</sub>In<sub>9</sub>/Cu hybrid electrodes from Cu<sub>10</sub>In<sub>5</sub>Al<sub>85</sub> and Cu<sub>12</sub>In<sub>3</sub>Al<sub>85</sub> precursor alloys, in 0.1 M N<sub>2</sub> and CO<sub>2</sub>-saturated KHCO<sub>3</sub> solution. (b) Comparisons of Faradaic efficiencies of CO and H<sub>2</sub> products for nanoporous Cu<sub>11</sub>In<sub>9</sub>/Cu hybrid electrodes from Cu<sub>10</sub>In<sub>5</sub>Al<sub>85</sub> and Cu<sub>12</sub>In<sub>3</sub>Al<sub>85</sub> precursor alloys.

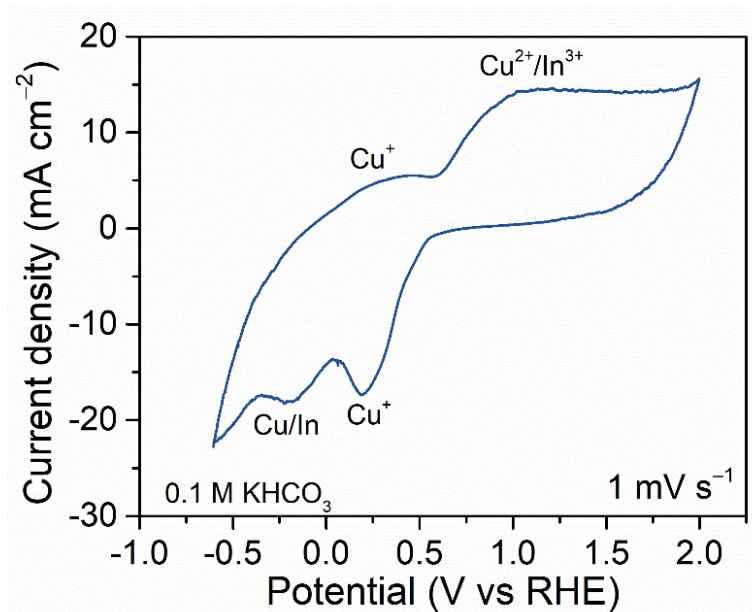

**Fig. S16.** Typical CV curve of as-dealloyed nanoporous Cu<sub>11</sub>In<sub>9</sub>/Cu from precursor Cu<sub>10</sub>In<sub>5</sub>Al<sub>85</sub> alloy in 0.1 M KHCO<sub>3</sub> solution. Scan rate: 1 mV s<sup>-1</sup>.

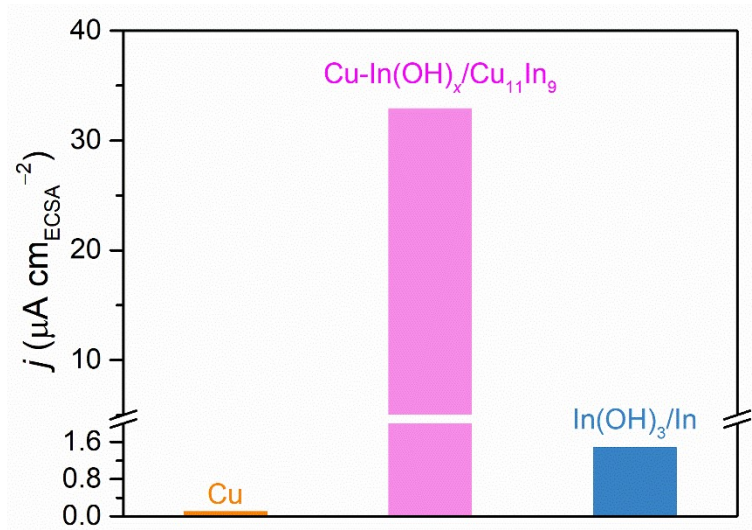

**Fig. S17.** Comparison of intrinsic activities for intermetallic Cu-In(OH)<sub>x</sub>/Cu<sub>11</sub>In<sub>9</sub>, Cu and In(OH)<sub>3</sub> towards CO<sub>2</sub>RR for CO product.

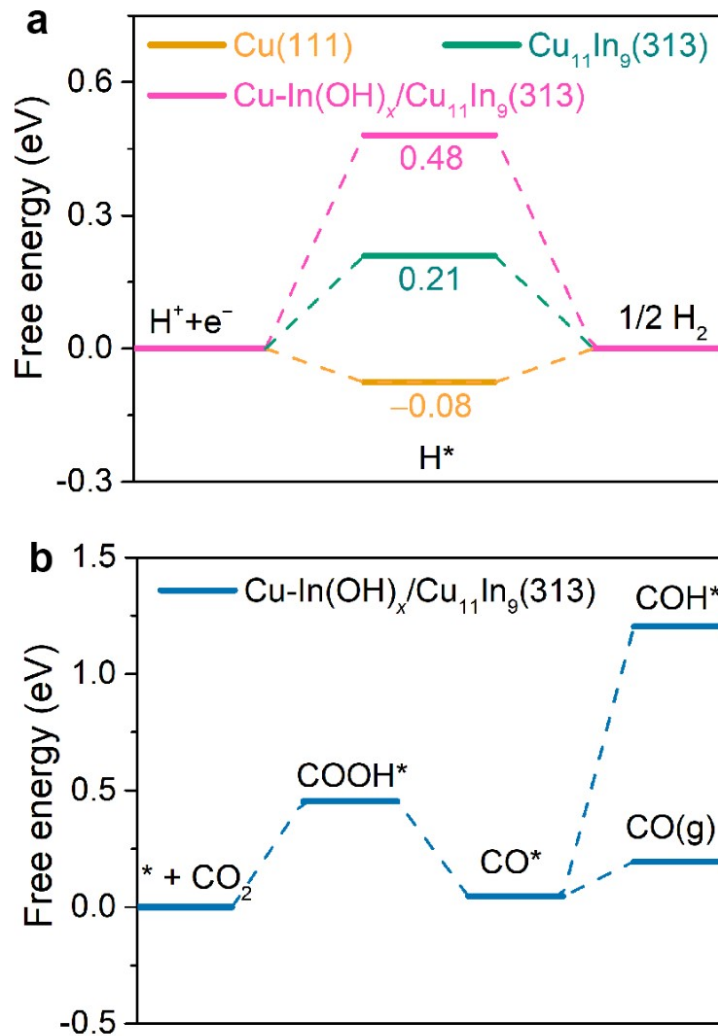

**Fig. S18.** (a) Free energies for the formation of  $H^*$  on  $Cu-In(OH)_x/Cu_{11}In_9(313)$  and  $Cu_{11}In_9(313)$ ,  $Cu(111)$  surface. (b) Reaction free energy diagram for the  $CO_2$  reduction with  $CO$  product or  $COH^*$  intermediate from the adsorbed  $*CO_2$  intermediate on intermetallic  $Cu-In(OH)_x/Cu_{11}In_9(313)$ .

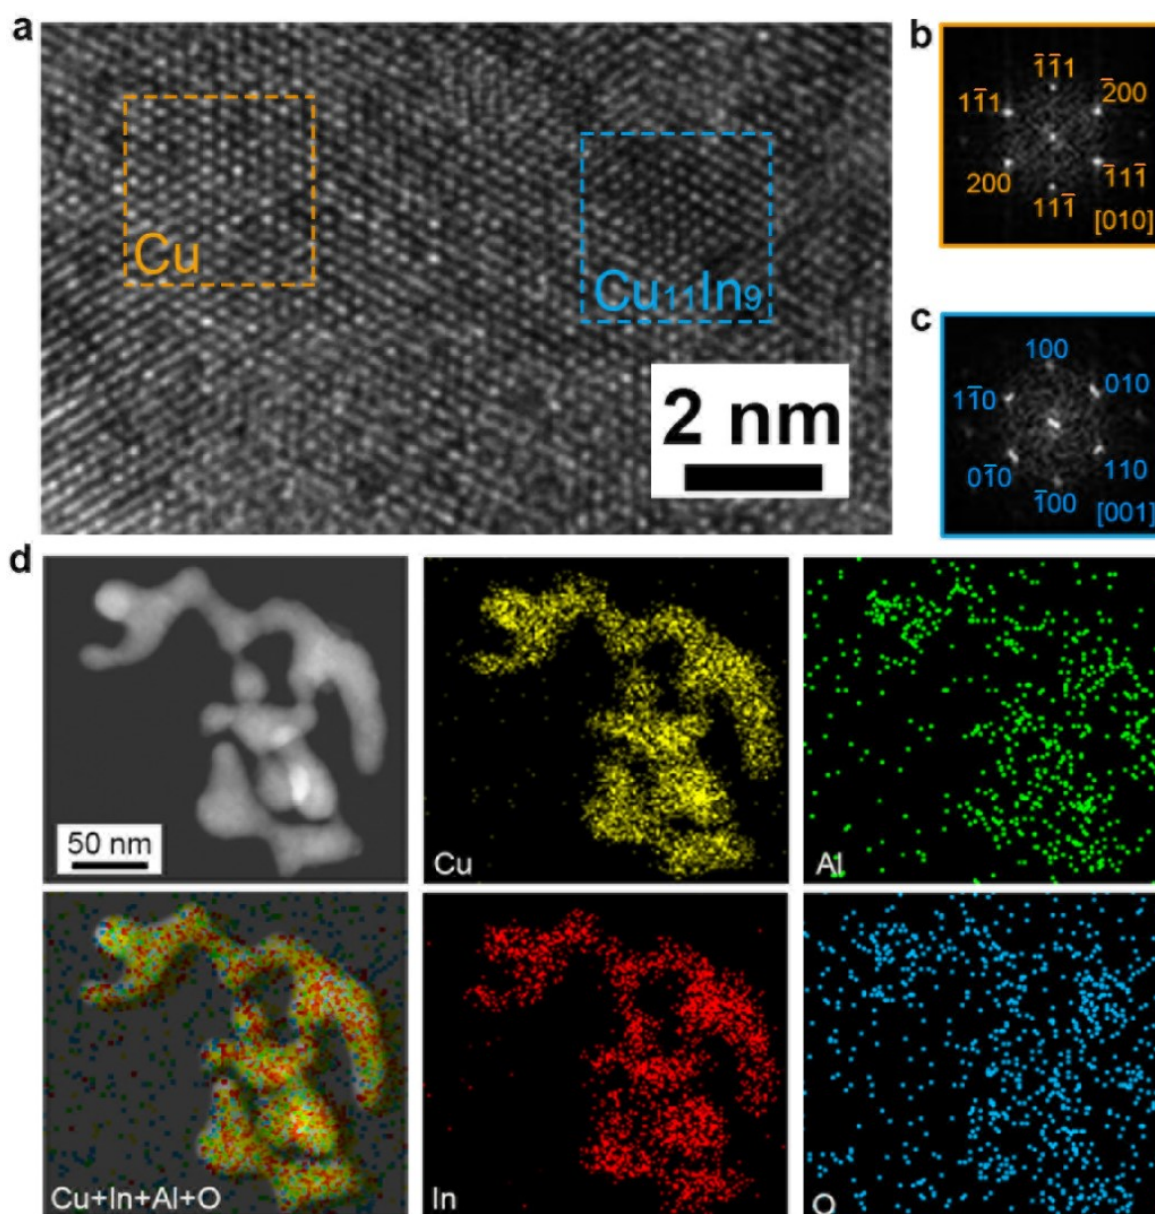

**Fig. S19.** (a) HRTEM image of  $\text{Cu}_{11}\text{In}_9/\text{Cu}$  interfacial region in nanoporous  $\text{Cu}_{11}\text{In}_9/\text{Cu}$  hybrid electrodes after the durability test, in which intermetallic  $\text{Cu}_{11}\text{In}_9$  and FCC Cu matrix are identified by their corresponding FFT patterns. (b, c) FFT patterns of monoclinic  $\text{Cu}_{11}\text{In}_9$  nanoparticles (b) and FCC Cu matrix (c) corresponding to the selected areas in (a). (d) STEM image and the corresponding STEM-EDS elemental mapping of Cu, In, Al and O in nanoporous  $\text{Cu}_{11}\text{In}_9/\text{Cu}$  hybrid electrode after the durability test.

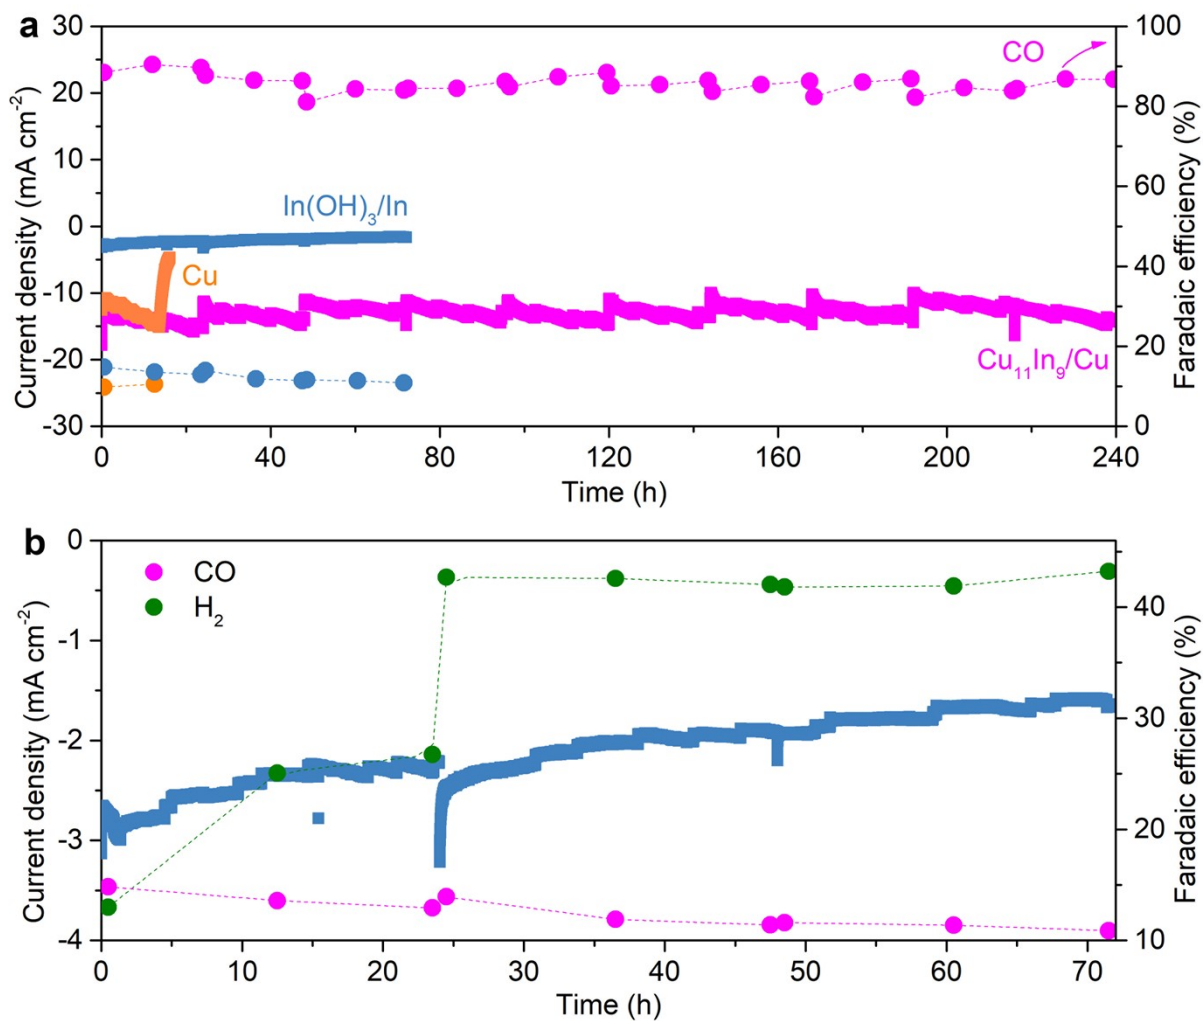

**Fig. S20.** (a) Comparison of the stability of nanoporous  $\text{Cu}_{11}\text{In}_9/\text{Cu}$ , nanoporous bare  $\text{Cu}$  and  $\text{In}(\text{OH})_3/\text{In}$  electrodes. (b) Magnification of the stability and Faradaic efficiencies of  $\text{H}_2$  and  $\text{CO}$  for the  $\text{In}(\text{OH})_3/\text{In}$  electrode.



**Table S1.** Comparison of electrochemical parameters of nanoporous Cu<sub>11</sub>In<sub>9</sub>/Cu with those of state-of-the-art metal-based CO<sub>2</sub>RR catalysts previously reported in 0.1 M KHCO<sub>3</sub> aqueous electrolyte.

| Electrocatalysts                      | Electrolyte             | <i>E</i><br>(V vs RHE) | <i>J</i> <sub>CO</sub><br>(mA cm <sup>-2</sup> ) | FE <sub>CO</sub> | <i>R</i> <sub>CO</sub><br>(μmol h <sup>-1</sup> cm <sup>-2</sup> ) | Refs.     |
|---------------------------------------|-------------------------|------------------------|--------------------------------------------------|------------------|--------------------------------------------------------------------|-----------|
| Cu <sub>11</sub> In <sub>9</sub> /Cu  | 0.1 M KHCO <sub>3</sub> | -0.6                   | 12.6                                             | 92.8%            | 235.1                                                              | This work |
| Zn P-NS                               | 0.1 M KHCO <sub>3</sub> | -1.2                   | 13                                               | 90%              | 242.5                                                              | [1]       |
| ZnO NS                                | 0.1 M KHCO <sub>3</sub> | -1.1                   | 16.1                                             | 83%              | 300.4                                                              | [2]       |
| Ni-N-C                                | 0.1 M KHCO <sub>3</sub> | -0.78                  | 9 A g <sup>-1</sup>                              | 85%              | /                                                                  | [3]       |
| Fe/NG-750                             | 0.1 M KHCO <sub>3</sub> | -0.6                   | 2.5                                              | 80%              | 46.6                                                               | [4]       |
| Pd nanoparticles                      | 0.1 M KHCO <sub>3</sub> | -0.89                  | 4                                                | 91%              | 74.6                                                               | [5]       |
| Fe-N-C                                | 0.1 M KHCO <sub>3</sub> | -1.0                   | 3.2                                              | 80%              | 59.7                                                               | [6]       |
| NCNTs                                 | 0.1 M KHCO <sub>3</sub> | -1.05                  | 3.8                                              | 80%              | 70.9                                                               | [7]       |
| CuO+ALD SnO <sub>2</sub>              | 0.1 M KHCO <sub>3</sub> | -0.6                   | 0.4                                              | 89%              | 7.5                                                                | [8]       |
| NC-CNTs (Ni)                          | 0.1 M KHCO <sub>3</sub> | -0.8                   | 7.2                                              | 91%              | 134.3                                                              | [9]       |
| Tri-Ag-NPs                            | 0.1 M KHCO <sub>3</sub> | -0.85                  | 1.25                                             | 95%              | 23.3                                                               | [10]      |
| Ag-NPs                                |                         | -0.85                  | 0.6                                              | 65%              | 11.2                                                               |           |
| Au-IO                                 | 0.1 M KHCO <sub>3</sub> | -0.5                   | 0.12                                             | 97%              | 2.2                                                                | [11]      |
| Plasma-treated Ag                     | 0.1 M KHCO <sub>3</sub> | -0.6                   | 2.1                                              | 90%              | 39.2                                                               | [12]      |
| Au nanoparticles                      | 0.1 M KHCO <sub>3</sub> | -0.9                   | 3.0                                              | 66%              | 56.0                                                               | [13]      |
| Au <sub>3</sub> Cu                    |                         | -0.72                  | 0.9                                              | 65%              | 16.8                                                               |           |
| Au <sub>3</sub> Cu@fct Au             | 0.1 M KHCO <sub>3</sub> | -0.8                   | 10                                               | 94.5%            | 186.5                                                              | [14]      |
| Au <sub>55</sub> /C                   | 0.1 M KHCO <sub>3</sub> | -0.6                   | 4.7                                              | 94.1%            | 87.7                                                               | [15]      |
| Fe-N-C                                | 0.1 M KHCO <sub>3</sub> | -0.6                   | 12.5                                             | 95%              | 233.2                                                              | [16]      |
| Cu-In                                 | 0.1 M KHCO <sub>3</sub> | -0.6                   | 0.9                                              | 90%              | 16.79                                                              | [17]      |
| Cu-N <sub>2</sub> /GN                 | 0.1 M KHCO <sub>3</sub> | -0.5                   | 0.8                                              | 81%              | 14.9                                                               | [18]      |
| Au <sub>1</sub> Ni <sub>1</sub> /CNFs | 0.1 M KHCO <sub>3</sub> | -0.98                  | 4                                                | 92%              | 74.6                                                               | [19]      |
| A-MnO <sub>x</sub> -H                 | 0.1 M KHCO <sub>3</sub> | -0.62                  | 10.4                                             | 94.8%            | 194.0                                                              | [20]      |
| CN-H-CNT                              | 0.1 M KHCO <sub>3</sub> | -0.5                   | 0.25                                             | 88%              | 4.7                                                                | [21]      |
| CuIn <sub>20</sub>                    | 0.1 M KHCO <sub>3</sub> | -0.6                   | 1.6                                              | 93%              | 29.8                                                               | [22]      |
| BAX-M-950                             | 0.1 M KHCO <sub>3</sub> | -0.66                  | 0.8                                              | 40%              | 14.9                                                               | [23]      |



|                                 |                          |       |       |       |       |      |
|---------------------------------|--------------------------|-------|-------|-------|-------|------|
| NP Au-Zn                        | 0.1 M NaHCO <sub>3</sub> | -0.6  | 4.95  | 90%   | 92.3  | [24] |
| Co <sub>1</sub> -N <sub>4</sub> | 0.1 M KHCO <sub>3</sub>  | -0.8  | 11.25 | 82%   | 209.9 | [25] |
| Cu-Pd NPs                       | 0.1 M KHCO <sub>3</sub>  | -0.9  | 2.83  | 87%   | 52.8  | [26] |
| Ag@Cu-7                         | 0.1 M KHCO <sub>3</sub>  | -1.06 | 1.23  | 82%   | 22.9  | [27] |
| Zn(101)                         | 0.1 M KHCO <sub>3</sub>  | -0.9  | 5.4   | 45%   | 100.7 | [28] |
| Cu-In alloy                     | 0.1 M KHCO <sub>3</sub>  | -0.8  | 0.18  | 35%   | 3.4   | [29] |
| WIT SnO <sub>2</sub>            | 0.1 M KHCO <sub>3</sub>  | -0.89 | 1.71  | 38%   | 31.9  | [30] |
| Pd Icosahedra/C                 | 0.1 M KHCO <sub>3</sub>  | -0.8  | 1.9   | 91.1% | 35.4  | [31] |
| FePGH-H                         | 0.1 M KHCO <sub>3</sub>  | -0.44 | 1.1   | 98%   | 20.5  | [32] |
| Ni-CTF                          | 0.1 M KHCO <sub>3</sub>  | -0.9  | 1.75  | 96%   | 32.6  | [33] |
| Au foil                         | 0.1 M KHCO <sub>3</sub>  | -1.0  | 2     | 35%   | 37    | [34] |

**Table S2.** ICP analysis of Cu and In ions in electrolyte before and after cycling measurement of nanoporous  $\text{Cu}_{11}\text{In}_9/\text{Cu}$  electrode.

|                             | Cu (mg/L) | In (mg/L) |
|-----------------------------|-----------|-----------|
| Original electrolyte        | 0.0468    | 0.0289    |
| Electrolyte after recycling | 0.0545    | 0.0348    |

## Supplementary references

- (1) K. Liu, J. Wang, M. Shi, J. Yan, Q. Jiang, *Adv. Energy Mater.* **2019**, *9*, 1900276.
- (2) Z. Geng, X. Kong, W. Chen, H. Su, Y. Liu, F. Cai, G. Wang, J. Zeng, *Angew. Chem. Int. Ed.* **2018**, *130*, 6162.
- (3) W. Ju, A. Bagger, C. P. Hao, A. S. Varela, I. Sinev, V. Bon, B. R. Cuenya, S. Kaskel, J. Rossmeisl, P. Strasser, *Nat. Commun.* **2017**, *8*, 944.
- (4) C. Zhang, S. Yang, J. Wu, M. Liu, S. Yazdi, M. Ren, J. Sha, J. Zhong, K. Nie, A. S. Jalilov, Z. Li, H. Li, B. I. Yakobson, Q. Wu, E. Ringe, H. Xu, P. M. Ajayan, J. M. Tour, *Adv. Energy Mater.* **2018**, *8*, 1703487.
- (5) D. Gao, H. Zhou, J. Wang, S. Miao, F. Yang, G. Wang, J. Wang, X. Bao, *J. Am. Chem. Soc.* **2015**, *137*, 4288.
- (6) A. S. Varela, M. Kroschel, N. D. Leonard, W. Ju, J. Steinberg, A. Bagger, J. Rossmeisl, P. Strasser, *ACS Energy Lett.* **2018**, *3*, 812.
- (7) P. P. Sharma, J. Wu, R. M. Yadav, M. Liu, C. J. Wright, C. S. Tiwary, B. I. Yakobson, J. Lou, P. M. Ajayan, X. D. Zhou, *Angew. Chem. Int. Ed.* **2015**, *127*, 13905.
- (8) M. Schreier, F. Héroguel, L. Steier, S. Ahmad, J. S. Luterbacher, M. T. Mayer, J. Luo, M. Gratzel, *Nat. Energy* **2017**, *2*, 17087.
- (9) Q. Fan, P. Hou, C. Choi, T. S. Wu, S. Hong, F. Li, Y. L. Soo, P. Kang, Y. Jung, Z. Sun, *Adv. Energy Mater.* **2020**, *10*, 1903068.
- (10) S. Liu, H. Tao, L. Zeng, Q. Liu, Z. Xu, Q. Liu, J. L. Luo, *J. Am. Chem. Soc.* **2017**, *139*, 2160.
- (11) A. S. Hall, Y. Yoon, A. Wuttig, Y. Surendranath, *J. Am. Chem. Soc.* **2015**, *137*, 14834.
- (12) H. Mistry, Y. W. Choi, A. Bagger, F. Scholten, C. S. Bonifacio, I. Sinev, N. J. Divins, I. Zegkinoglou, H. S. Jeon, K. Kisslinger, E. A. Stach, J. C. Yang, J. Rossmeisl, B. R. Cuenya, *Angew. Chem. Int. Ed.* **2017**, *129*, 11552.
- (13) D. Kim, J. Resasco, Y. Yu, A. M. Asiri, P. Yang, *Nat. Commun.* **2014**, *15*, 4948.
- (14) D. Yu, L. Gao, T. Sun, J. Guo, Y. Yuan, J. Zhang, M. Li, X. Li, M. Liu, C. Ma, Q. Liu, A. Pan, J. Yang, H. Huang, *Nano Lett.* **2021**, *21*, 1003.
- (15) X. K. Wan, J. Q. Wang, Q. M. Wang, *Angew. Chem. Int. Ed.* **2021**, *133*, 1.
- (16) N. M. Adli, W. Shan, S. Hwang, W. Samarakoon, S. Karakalos, Y. Li, D. A. Cullen, D. Su, Z. Feng, G. Wang, G. Wu, *Angew. Chem. Int. Ed.* **2021**, *133*, 1035.
- (17) S. Rasul, D. H. Anjum, A. Jedidi, Y. Minenkov, L. Cavallo, K. Takanebe, *Angew. Chem. Int. Ed.* **2015**, *127*, 2174.
- (18) W. Zheng, J. Yang, H. Chen, Y. Hou, Q. Wang, M. Gu, F. He, Y. Xia, Z. Xia, Z. Li, B. Yang, L. Lei, C. Yuan, Q. He, M. Qiu, X. Feng, *Adv. Funct. Mater.* **2020**, *30*, 1907658.
- (19) J. Hao, H. Zhu, Y. Li, P. Liu, S. Lu, F. Duan, W. Dong, Y. Lu, T. Liu, M. Du, *Chem. Eng. J.* **2021**, *404*, 126523.
- (20) H. Han, S. Jin, S. Park, Y. Kim, D. Jang, M. H. Seo, W. B. Kim, *Nano Energy* **2021**, *79*, 105492.
- (21) X. Cui, Z. Pan, L. Zhang, H. Peng, G. Zheng, *Adv. Energy Mater.* **2017**, *7*, 1701456.
- (22) W. Luo, W. Xie, R. Mutschler, E. Oveisi, G. L. D. Gregorio, R. Buonsanti, A. Zütte, *ACS Catal.* **2018**, *8*, 6571.
- (23) W. Li, B. Herkt, M. Seredycha, T. J. Bando, *Appl. Catal. B-Environ.* **2017**, *207*, 195.
- (24) M. N. Hossain, Z. Liu, J. Wen, A. Chen, *Appl. Catal. B-Environ.* **2018**, *236*, 483.

- (25) Z. Geng, Y. Cao, W. Chen, X. Kong, Y. Liu, T. Yao, Y. Lin, *Appl. Catal. B-Environ.* **2019**, 240, 234.
- (26) Y. Mun, S. Lee, A. Cho, S. Kim, J. W. Han, J. Lee, *Appl. Catal. B-Environ.* **2019**, 246, 82.
- (27) Z. Chang, S. Huo, W. Zhang, J. Fang, H. Wang, *J. Phys. Chem. C* **2017**, 121, 11368.
- (28) B. Qin, Y. Li, H. Fu, H. Wang, S. Chen, Z. Liu, F. Peng, *ACS Appl. Mater. Interfaces* **2018**, 10, 20530.
- (29) Z. B. Hoffman, T. S. Gray, K. B. Moraveck, T. B. Gunnoe, G. Zangari, *ACS Catal.* **2017**, 7, 5381.
- (30) L. Fan, Z. Xia, M. Xu, Y. Lu, Z. Li, *Adv. Funct. Mater.* **2018**, 28, 1706289.
- (31) H. Huang, H. Jia, Z. Liu, P. Gao, J. Zhao, Z. Luo, J. Yang, J. Zeng, *Angew. Chem. Int. Ed.* **2017**, 129, 3648.
- (32) J. Choi, J. Kim, P. Wagner, S. Gambhir, R. Jalili, S. Byun, S. Sayyar, Y. M. Lee, D. R. MacFarlane, G. G. Wallace, D. L. Officer, *Energy Environ. Sci.* **2019**, 12, 747.
- (33) P. Su, K. Iwase, T. Harada, K. Kamiya, S. Nakanishi, *Chem. Sci.* **2018**, 9, 3941.
- (34) Y. Fang, J. C. Flake, *J. Am. Chem. Soc.* **2017**, 139, 3399.
